# Revisiting regulatory decoherence and phenotypic integration: accounting for temporal bias in co-expression analyses

Haoran Cai<sup>1\*</sup>, David L. Des Marais<sup>1</sup>

<sup>1</sup>Department of Civil and Environmental Engineering, MIT.  
15 Vassar St., Cambridge, MA, 02139 USA

SUBMITTED AS A RESEARCH ARTICLE

NUMBER OF REFERENCES: 110 references

KEYWORDS: Differential Co-expression; Dynamic correlation; Regulatory coherence; Phenotypic integration

---

\*To whom correspondence should be addressed. [hrcai@mit.edu](mailto:hrcai@mit.edu)

## 1 ABSTRACT

2 Environment can alter the degree of phenotypic variation and covariation, potentially influencing evolu-  
3 tionary trajectories. However, environment-driven changes in phenotypic variation remain understudied.  
4 In an effort to exploit the abundance of RNASequencing data now available, an increasing number of  
5 ecological studies rely on population-level correlation to characterize the plastic response of the entire  
6 transcriptome and to identify environmentally responsive molecular pathways. These studies are funda-  
7 mentally interested in identifying groups of genes that respond in concert to environmental shifts. We  
8 show that population-level differential co-expression exhibits biases when capturing changes of regulatory  
9 activity and strength in rice plants responding to elevated temperature. One possible cause of this bias is  
10 regulatory saturation, the observation that detectable co-variance between a regulator and its target may  
11 be low as their transcript abundances are induced. This phenomenon appears to be particularly acute for  
12 rapid-onset environmental stressors. However, our results suggest that temporal correlations may be a  
13 reliable means to detect transient regulatory activity following rapid onset environmental perturbations  
14 such as temperature stress. Such temporal bias is likely to confound the studies of phenotypic integration,  
15 where high-order organismal traits are hypothesized to be more integrated with strong correlation under  
16 stressful conditions, while recent transcriptome studies exhibited weaker coexpression between genes under  
17 stressful conditions. Collectively, our results point to the need to account for the nuances of molecular  
18 interactions and the possibly confounding effects that these can introduce into conventional approaches  
19 to study transcriptome datasets.

## 1 INTRODUCTION

Organisms evolve to maximize their individual performance under dynamically changing environments. The capacity of a single genotype to generate a range of environmentally induced phenotypes is known as phenotypic plasticity. Phenotypic plasticity has been widely documented (Stotz et al. 2021) and has recently received considerable attention as it may allow populations to persist in the face of rapid climate change (West-Eberhard 2003, Oostra et al. 2018, Nicotra et al. 2010, Gibert et al. 2019). Understanding the molecular and genetic basis of phenotypic plasticity has long been a goal for evolutionary genetics (Smith 1990, Bradshaw 1965) as a means to dissect trait co-variances and to predict the functional consequences of variable plastic mechanisms within and between populations (Des Marais et al. 2013, Palakurty et al. 2018, Tanner et al. 2022). Gene expression neatly bridges an organism’s genotype to its cellular biology and, by extension, higher-order developmental and physiological processes (Wray et al. 2003, Carroll 2008) and, at genome scale, is orchestrated by the underlying “Transcription Regulatory Network” (TRN) (Gibson 2008). Transcription factors (TF) are key nodes in TRNs that regulate the expression of other genes (Buchanan et al. 2010), coordinating the entire transcriptional program, and are often found to drive large-effect loci associated with the environmental response (Alonso-Blanco et al. 2005, Yano et al. 2000, Fukao et al. 2011). Transcriptional regulation can be highly responsive to both external and internal environmental cues, although formally linking these cellular phenotypes to whole organism environmental responses remains a challenge.

Considering each gene’s expression separately may fail to capture the full picture of the evolution and plastic response of the transcriptome collectively. Examining gene modules with coherent expression will make it more tractable to identify groups of genes associated with ecologically relevant outcomes (Palakurty et al. 2018). Therefore, gene co-expression and network analysis have been widely used to study multiple genes together. For example, co-expression and clustering analysis have been used to understand how the environment alters the expression and function of suits of genes simultaneously (Yan et al. 2019, Lea et al. 2019, Tanner et al. 2022, Zhao et al. 2016, Wang et al. 2013, Palakurty et al. 2018, Schneider et al. 2014, Fu et al. 2014), or to identify evolutionarily conserved functional modules between species (Ferrari et al. 2018, Gao et al. 2012, Monaco et al. 2015, Ruprecht et al. 2017a,b, Horn et al. 2016). However, the ease of performing differential co-expression analyses using existing approaches such as WGCNA (Langfelder and Horvath 2008) can obscure the assumptions they make about regulatory interactions. It is critical to understand possible biases and confounding factors using co-expression and module analysis.

Phenotypic integration refers to the magnitude of correlations among groups of related traits in a given organism (Pigliucci 2003). Phenotypic integration and modularity represent important factors and constraints that influence the phenotypic plasticity and evolutionary trajectory (Villamil 2018, Gianoli and Palacio-López 2009, Pigliucci and Preston 2004, Schlichting 1989). The ecological significance of patterns of changing phenotypic integration is not fully understood. Previous studies in phenotypic integration hypothesized that the number and strength of significant correlations among traits increase

57 with environmental stress (Waitt and Levin 1993, Schlichting 1989, Gianoli 2004, García-Verdugo et al.  
58 2009, Chapin 1991). However, recent studies on molecular traits (e.g., genome-wide gene expression)  
59 provided seemingly conflicting evidence: the degree of covariation tends to be higher under benign  
60 conditions than under stressful conditions (Lea et al. 2019, Tanner et al. 2022, Southworth et al. 2009,  
61 Anglani et al. 2014). We here hypothesize that low population-level trait-trait correlations in gene expression  
62 under a stressful condition may be caused by a widely observed phenomenon called regulatory saturation.  
63 Regulatory saturation can occur when the transcript abundance of regulators is too high such that extra  
64 transcript will not lead to increased transcription of target genes. In a regulatory saturation regime, a  
65 low population correlation does not necessarily mean that the regulatory activity between two genes is  
66 low. Conversely, it means the regulation and integration strength of two genes are tight and strong. In  
67 the present work, we account for such potential confounding factors by considering the temporal context  
68 of gene expression.

69 Extensive efforts have been made to exploit the so-called “fourth dimension” of environmental response —  
70 time — to better understand the dynamics of TRNs and to identify putative signaling pathways or key  
71 regulatory genes (Bechtold et al. 2016, Yeung et al. 2018, Varala et al. 2018, Zander et al. 2020, Song et al.  
72 2016, Greenham et al. 2017, Windram et al. 2012, Gargouri et al. 2015, Alvarez-Fernandez et al. 2020).  
73 Here, we exploit this temporal component of gene co-expression to characterize the dynamic organismal  
74 response to environmental conditions using an existing data set in rice (Wilkins et al. 2016). We contrast  
75 two broad approaches for using correlations between the transcript abundances of two genes: temporal  
76 correlations and population correlations. Population correlations are correlations of multiple individual  
77 samples at a given time point. Temporal correlations are correlations of two transcripts’ abundance over  
78 a time course for an individual sample.

79 Our analyses and simulation demonstrate that multiple types of temporal bias can occur when analyzing  
80 gene expression data, any of which could confound ecological or evolutionary inference. First, the number,  
81 identity, and period between sampling time points may not capture the transient transcriptional response  
82 of genes and, by extension, their co-variance with other transcripts (Bar-Joseph et al. 2012). Second,  
83 population coexpression may fail to capture transient induction of regulatory activities when the gene-gene  
84 interaction is under a regulatory saturated regime. Regulatory saturation can be particularly misleading  
85 because a population correlation may capture the transient response of a single gene’s expression, yet  
86 miss responsive regulatory interactions if the duration of high regulatory activity is short. A potential  
87 implication of regulatory saturation points to the need to account for temporal bias when studying  
88 phenotypic integration, or the regulatory coherence for molecular traits. Our study provides evidence  
89 of increasing within-individual phenotypic integration following stress treatments. Third, temporal  
90 correlation can alleviate the second temporal bias and capture transient interactions. Collectively, our  
91 work emphasizes both that transient regulatory interactions may lead to bias in population transcriptomic  
92 analyses as well as offer an opportunity to understand the evolution of gene regulation in better detail if  
93 properly accounted for in analyses.

## 94 2 MATERIALS AND METHODS

### 95 2.1 Data retrieval

96 We utilized a TRN prior previously constructed by [Wilkins et al. \(2016\)](#), which was obtained from the  
97 integration of ATAC-seq (Assay for Transposase-Accessible Chromatin using sequencing) data and the  
98 CIS-BP database of TF binding motif ([Weirauch et al. 2014](#)). We elected not to use their complete  
99 “Environmental Gene Regulatory Influence Network” because the estimation of the final network relied on  
100 information from mRNA-seq time series data; the analyses presented here represent a unique approach to  
101 analyzing these data. Genes that had corresponding *cis*-regulatory elements of TF in a region of open  
102 chromatin in their promoter regions are identified as the target gene for a given TF ([Wilkins et al. 2016](#)).  
103 Note that the open accessible regulatory region derived from the ATAC-seq of rice leaves remained stable  
104 across multiple environmental conditions in the Wilkins et al. study. In total, this “network prior” has  
105 38,137 interactions: 357 TFs were inferred to interact with 3240 target genes. Interactions can be between  
106 TFs and non-TF targets, or between two TFs.

107 The RNA-seq data derive from chamber-grown plants and were retrieved from the Gene Expression  
108 Omnibus ([www.ncbi.nlm.nih.gov/geo/](http://www.ncbi.nlm.nih.gov/geo/)) under accession number GSE74793. This dataset comprises  
109 time-coursed libraries for four rice cultivars exposed to control (benign), heat shock, and water deficit  
110 conditions. Samples were collected with 15 min intervals for up to 4h for each of the treatments; specifically,  
111 18 time points for controlled conditions; 9 time points for drought treatment; and 16 time points for heat  
112 treatment. Here we used a time window of nine time points in each condition for analysis. TF family  
113 annotations were downloaded from the Plant TF database ([Riaño-Pachón et al. 2007](#)), from which Heat  
114 Shock Factors are those with the TF family label “HSF”. “Known” drought-related TFs were obtained  
115 from <https://funricegenes.github.io/> in June 2020 using the search terms “drought”, “ABA”, and  
116 “drought tolerance”.

### 117 2.2 Dynamic correlations for regulator-target pairs

118 The expression relationship observed between genes in a time series sample may be caused by the time  
119 lag inherent in molecular interactions, in this case, transcriptional regulation. Such time lag reflects the  
120 time required for a TF’s activity to influence the expression of its target genes because transcription and  
121 translation take place over non-negligible time periods. Traditional correlation coefficients (e.g., Pearson  
122 correlation) cannot account for the staggered relationship between a regulator and a target. Here, we  
123 used a metric we call Max Cross Correlation (MCC), building on the cross-correlation between transcript  
124 abundances estimated by RNA-Seq, to examine the activities of regulatory interactions. The MCC over  
125 the time course has a direction constraint (from regulator to target) to evaluate the regulatory status.  
126 Consider two discrete time series denoting  $f(t)$  (regulator) and  $g(t)$  (target), both of length of  $N$  number  
127 of time points, the cross-correlation function is defined as:

$$S_{f,g}(\tau) = \begin{cases} \frac{1}{N-\tau} \sum_{n=0}^{N-|\tau|-1} \tilde{f}(n+\tau)\tilde{g}(n), & \tau \geq 0 \\ S_{g,f}(-\tau), & \tau < 0 \end{cases} \quad (1)$$

128 where the  $\tilde{f}(n)$  is a normalized time series (zero mean, unit variance). The maximum cross correlation  
 129  $S_{f,g}(\tau)$  is calculated under condition of  $m \leq \tau \leq 0$ , where  $m$  is the max delay. The time delay that  
 130 possesses the max correlation is defined as  $\tau_{reg}$ , representing the approximate time delay that occurs  
 131 between a given regulatory-target pair. The max delay is set as 1, which in the current dataset represents  
 132 a 15 min time interval. For comparison between maximum cross correlation distributions under multiple  
 133 conditions, we used a Kolmogorov-Smirnov test using the *ks.test* function in *R*. Note that it is unknown  
 134 to what extent of the temporal resolution the present method is effective in revealing the transient  
 135 dynamic of the regulatory activity (the sampling interval in our dataset is 15 min).

### 136 2.3 Simulations for the minimal activation model

137 To illustrate the potential bias in capturing changing regulatory activities by using population level  
 138 correlation, we implement simulation through a minimal activation model. The rate of production of TF  
 139  $X$  and gene  $Y$  (Fig. 4A) is described by the following equation:

$$[\dot{X}] = \frac{\beta_x S_x}{1+S_x} + \beta_{basal} - d_x[X], \quad (2)$$

$$[\dot{Y}] = \frac{\beta_y \left(\frac{[X]}{K_x}\right)^n}{1+\left(\frac{[X]}{K_x}\right)^n} + \beta_{basal} - d_y[Y]. \quad (3)$$

140  $[X]$  and  $[Y]$  denote the mRNA concentrations of TF  $X$  and gene  $Y$  respectively. TF  $X$  affects the  
 141 transcription of gene  $Y$ . The regulated expression of genes is represented by Hill function with cooperativity  
 142 exponent  $n$ . It is assumed that each transcript degrades at a rate proportional to its own concentration  
 143 ( $d_x$  and  $d_y$ ). Assume that the basal synthesis rate for  $X$  and  $Y$  is constant and equal with  $\beta_{basal}$ .  $\beta_y$  can  
 144 be taken as the maximum strength of regulations. The stochastic dynamics of the system are implemented  
 145 through Gillespie stochastic simulation algorithm (Gillespie 1977). The Hill function can be tuned by  
 146 the binding affinity  $K_x$  and the Hill coefficient  $n$ . The Hill coefficient quantifies the cooperativity of  
 147 transcription factor bindings and thus the steepness of the sigmoidal stimulus-response curve of regulation.  
 148 TFs often work cooperatively, where the binding of one TF to DNA enhances the binding of extra TFs.  
 149 For example, a Hill coefficient  $n > 1$  is indicative of positive cooperativity and thus, the system exhibits  
 150 ultrasensitivity (Blüthgen et al. 2007). The other parameter,  $K_x$ , indicates the binding affinity of a  
 151 TF-DNA binding. We can manipulate the active range of regulatory interactions by these two parameters.  
 152 A set of parameters including the induction signal strength  $S_x$  are determined to enable two regulatory  
 153 regimes (Fig. 4C and 4F). Two types of perturbation imposed on cells at steady state are simulated,  
 154 including press and pulse perturbations (Fig 4B). The press perturbation maintains the external signal  
 155 at a certain high level throughout the time course, whereas the pulse perturbation indicates a discrete,  
 156 transient induction of the external signal. We assume the external perturbation modulates the gene  
 157 expression dynamics by the signal  $S_x$ .

158 Temporal dynamics of TF  $X$  and gene  $Y$  were simulated for 100 times. The cross-correlation function is  
159 calculated for the bulk time series of  $X$  and  $Y$  (average of 100 simulations), whereas the population-level  
160 Pearson’s correlation coefficient (PCC) is calculated at each time point by using 100 simulations during  
161 the simulation.

## 162 3 RESULTS

### 163 3.1 Temporal bias in revealing dynamic regulatory interactions

164 We first evaluate the overall dynamic patterns of pairwise regulatory interactions by calculating the  
165 Maximum Cross Correlation (MCC, see Methods) for each pair of transcripts in a static network reported  
166 previously (Wilkins et al. 2016). The data comprise four rice cultivars grown under control, dehydration  
167 stress, or elevated temperature conditions; here we analyze the data by condition over a time duration  
168 of 135 minutes following the incidence of stress. Calculated MCC (Figure 1) is from all four cultivars  
169 were merged stress-wise. We set a threshold of 0.69 (p-value = 0.01) together with a fold-change cutoff  
170 (Fig. 2) according to the MCC under controlled conditions as the cutoff for the activation of regulatory  
171 interactions. We use the terms regulatory coherence and decoherence to mean increasing or decreasing  
172 co-expression, respectively. The coherence in our analyzes is reflected in higher MCCs under heat or  
173 dehydration stress conditions compared to control samples, as imposed by Wilkins et al. (Wilkins et al.  
174 2016).

175 The MCC distributions (Figure 1) reveal that stressful environments increase the coexpression strength  
176 among measured transcripts in the network prior. The distribution of the MCC under heat (Kolmogorov-  
177 Smirnov test statistic  $D = 0.0445$ , p-value  $< 2.2 \times 10^{-16}$ ) and drought (Kolmogorov-Smirnov test statistic  
178  $D = 0.0929$ , p-value  $< 2.2 \times 10^{-16}$ ) conditions are significantly different from the control condition.  
179 We identified significant TF-gene interactions in stressful conditions which were not observed in the  
180 controlled condition, and vice versa. We found greater support for the former number: out of 38127 total  
181 interactions in the network prior, 496 and 839 pairs transition to active pairs in heat and drying stress,  
182 respectively (light blue points in Fig. 2A and 2B), whereas only 91 and 115 of them transition to inactive  
183 pairs under heat or drying, respectively. The observation of regulatory coherence is robust to various  
184 thresholds for activation (Fig. S1 and Fig. S2) and the max time lag (See Supporting Information A.2  
185 and Fig. S3). Collectively, these results suggest a strong bias towards regulatory coherence in this rice  
186 expression dataset.

187 Our observation that co-expression increases with the onset of stress (regulatory coherence) is seemingly  
188 inconsistent with a recent study. Working with gene expression profiles of human monocytes exposed to a  
189 stress *in vitro*, Lea et al. calculated the differential population correlation among pairwise transcripts  
190 and found evidence supporting regulatory decoherence following perturbation (Lea et al. 2019). To  
191 explore the possible role of statistical methodology to explain the differing results of our two studies,  
192 we conducted a cross-sectional analysis by calculating population-level coexpression in the above rice

193 gene expression data and our static network prior. Strikingly, for heat shock stress response, population  
194 correlations show little or no evidence of regulatory coherence under stress (Fig. [3A](#), [S5](#) and [S7](#)). At many  
195 time points, the distributions of correlation coefficients under the stress condition are skewed towards  
196 regulatory decoherence (Fig. [S5](#)). These results are at odds with our observation of strong regulatory  
197 coherence in heat-stressed individuals when temporal correlations are assessed. An even more striking  
198 contrast is observed in the so-called heat shock regulon (Fig. [3A](#) and Fig. [3B](#)), formed by the Heat Shock  
199 Family TFs and their interactions with target genes in the static network prior, where the assessment  
200 using temporal correlations generates a starker contrast between control and stress condition than using  
201 population correlation at any time point. Such observation suggested that two approaches may capture  
202 different aspects of stress responses.

203 On the other hand, for drought stress response, population-based coexpression analysis shows regulatory  
204 coherence at several time points (Fig. [S6](#)). One confounding factor that may inflate estimated correlations,  
205 as pointed out by [Lea et al. \(2019\)](#), [Parsana et al. \(2019\)](#), is technical and latent biological covariates  
206 (e.g. genotype, cultivar effect) which may lead to spurious correlations. To explore how the inclusion of  
207 multiple genotypes in a population sample might affect correlation estimates, we use another dataset from  
208 *Brachypodium* with larger number of replicates for drought treatments across two inbred lines (Yun et al.  
209 2021, in prep). In this larger, genotypically segregated sample, we still observe evidence of regulatory  
210 coherence in transcriptional response to drought treatment (Fig. [S4](#)).

### 211 3.2 Regulatory saturation as a cause for temporal bias

212 Through a simple mathematical model, we illustrate how regulatory saturation may be a confounding  
213 factor for identifying environmentally responsive transcriptional interactions. We contrast the outcomes  
214 of population-level metrics with our measure based on cross-correlation. A typical regulation function  
215 between a TF and a target gene (modeled as a dose-response curve) can be characterized as a Hill  
216 function ([Alon 2019](#), [Chu et al. 2009](#)), which is a sigmoidal curve (See Methods) as shown in Fig. [4C](#) and  
217 [4F](#) (grey line). Two perturbation regimes are considered: A saturated regime in which additional TF  
218 transcripts beyond some concentration threshold fail to induce additive responses in their target genes,  
219 and a non-saturated regime characterized as the portion of a dose-response curve in which additional  
220 TF transcripts are associated with increased expression of their targets. We assume that the external  
221 perturbation modulates the gene expression dynamics by the signal  $S_x$ . Smaller  $K_x$  and larger Hill  
222 coefficients  $n$ , indicative of higher binding affinity and cooperativity of transcription factor binding (See  
223 Methods), increase the probability of regulatory saturation after environmental perturbation. Saturation  
224 of the regulatory interaction effectively masks the differential regulatory interaction upon perturbation,  
225 even if the TF  $X$  is nominally an environmentally induced activator of the gene  $Y$ . In addition, two  
226 possible external perturbation regimes are simulated (Fig. [4B](#)): press perturbation and pulse perturbation,  
227 which differ in the duration of the perturbation imposed on the given regulatory pair. If the upstream  
228 signal for a TF-gene pair has the property of adaptation, the signal induction may only last for a short  
229 period of time. Adaptation here is defined by the ability of circuits to respond to input change but to



230 return to the pre-stimulus output level, even when the input change persists (Ma et al. 2009, Briat et al.  
231 2016).

232 Fig. 4E shows that, under a saturated regime, the population-level correlation between  $X$  and  $Y$  can  
233 appear even lower under a perturbation, despite the fact that the interaction between  $X$  and  $Y$  is activated  
234 by an environmental perturbation. On the other hand, under a non-saturated regime, the population-level  
235 correlation between the regulator and its target increases (Fig. 4H). It should be noted that under a  
236 non-cooperative binding mode (i.e., Hill coefficient equals 1), the population-level correlation will decrease  
237 independently under the saturation regime. Therefore, how population-level correlations change relies  
238 upon whether a given transcriptional interaction is under a saturated regime or not; population-level  
239 correlations can fail to capture such transient environmentally responsive links. These results are robust  
240 across parameter configurations (Fig. S8 and Fig. S9). Such a bias can be termed the temporal bias  
241 (Yuan et al. 2021). However, the temporal correlation between TF  $X$  and target gene  $Y$  is sensitive  
242 enough to characterize the environmentally induced activation under both saturated and non-saturated  
243 regimes induced by either press or pulse perturbation by the signal,  $S_x$  (Fig. 4D and G). These results  
244 highlight the likely incidence of false negatives in identifying responsive gene interactions when relying on  
245 population-level correlations. While Bar-Joseph and colleagues (Bar-Joseph et al. 2012) have argued that  
246 temporal information enable the identification of transient transcription changes, our results suggest that  
247 even if transient transcriptional changes of single gene are captured the population correlation analysis  
248 can also have low power to identify responsive links because of potential regulatory saturation (as shown  
249 in simulation Fig. 4E and empirical data Fig. 3A and 3B), reinforcing the importance of using temporal  
250 information to recover environmentally responsive interactions.

251 However, despite our observation that temporal correlation can robustly detect transient responses of  
252 regulatory activity, this approach may obscure the complicated dynamics of regulatory activity over the  
253 time course. Specifically, temporal correlations cannot track real-time regulatory activities (Fig. 4D and  
254 Fig. 4G). Conversely, population correlation over multiple time-steps may recover the dynamic activity  
255 of a regulatory interaction (Fig. 4E and 4H). In the following sections, we will leverage the temporal  
256 component of stress response by using both temporal correlations and population correlations over time.

### 257 3.3 Temporal correlations prioritizing novel candidates in regulating stress 258 responses

259 We next analysed dynamic transcriptional rewiring through temporal correlation. We examined whether  
260 certain TF families affect the activation of regulatory interactions (Fig. S10) and find that, as expected,  
261 many TFs with high differential mean MCC in the heat-stress data set are annotated as Heat Shock  
262 transcription Factors (HSFs).

263 Inspecting the relationship between differential gene expression and the differential activity for a given  
264 TF here estimated by MCCs of a TF with its target genes reveals that several known HSFs do not  
265 independently show strong expression response to the stressor but do show a clear response according

266 to the differential activity. We also find several interesting candidate TFs outside of the HSF family  
267 which have high differential regulatory scores but little or no apparent differential expression in pairwise  
268 contrasts between control and treatment conditions (Fig. 5A). In the heat data set, the TF OsTCP7 has  
269 a differential regulatory score of 0.54 but was not identified as differentially expressed by Wilkins et al.  
270 2016 (Fig. 5C). TCPs are broadly involved in regulating cell proliferation and growth (Martín-Trillo and  
271 Cubas 2010) and so OsTCP7 may be an interesting candidate for functional validation in the context of  
272 heat stress response.

273 While the HSF TFs comprise a gene family and are generally interpreted as coordinating plant response  
274 to heat stress (von Koskull-Döring et al. 2007), the regulatory control of response to soil drying is more  
275 distributed among diverse gene families and regulatory pathways (Joshi et al. 2016, Manna et al. 2020,  
276 Des Marais et al. 2012). Our analysis of the drought response data identified several TFs with previously  
277 demonstrated roles in rice dehydration response (Fig. 5D). These include HOX24 (Bhattacharjee et al.  
278 2021) and ZFP182 (Huang et al. 2012), both of which were also found by Wilkins et al. to show a  
279 strong differential response. Several interesting candidates emerge among the list of TFs which have  
280 high differential regulatory score but low differential expression response. One such gene is PIF-Like  
281 12 (Nakamura et al. 2007) which, to our knowledge, has no known role in dehydration response but is  
282 paralogous to OsPIL1 which integrates cues from the circadian clock and dehydration signaling to control  
283 internode elongation in rice (Todaka et al. 2012). Additional candidate genes with high regulatory scores  
284 under elevated temperature or dehydration stress are shown in Table S1 and S2. We hypothesize that the  
285 differential activity calculated by temporal correlation could be used to identify novel stress-responsive  
286 regulators in this and other systems.

### 287 3.4 Dynamic TF activity under dehydration conditions reveal signal propa- 288 gation upon environmental perturbations

289 Above we showed using stochastic simulations that population correlations may be suitable for estimating  
290 the activity of a regulatory link even though they may miss transient interaction changes (Fig. 4). On the  
291 other hand, temporal correlation is capable of capturing transient responses of regulatory activities but  
292 may miss some important information over the whole time course of treatment since it only gives a single  
293 summarized value without possible temporal fluctuation during the time course, leading to a different type  
294 of temporal bias. In the rice dataset considered here, temporal correlations do not show a strong signal  
295 in detecting drought-responsive TF (Fig. 5B), while temporal correlations do detect heat-responsive TFs  
296 (Fig. 5A). To explore the possible reason for this discrepancy, we next analyze TF activities over time  
297 under drought treatment by using the population correlation. We find that the population correlation  
298 can indeed unveil the dynamic regulatory map in additional layers through temporal correlation.

299 We first construct a network hierarchy in the TF-only subnetwork from the network prior (Fig. 6A).  
300 Since the network has feedback loops (See Supporting Information A.1), we used a generalized bottom-up  
301 approach (Yu and Gerstein 2006). In essence, we define all TFs that do not regulate any other TFs as

302 bottom TFs and define the level of the remaining TFs by their shortest distance to a bottom TF. Caveats  
303 and the other alternative approach constructing hierarchy are discussed in the Supporting Information  
304 (Fig. [S12](#)). 89 of the 357 TFs in the network neither regulate other TFs nor are themselves regulated by  
305 other TFs; thus, these 89 TFs are not present in the generalized hierarchical structure. The regulatory  
306 signal can be amplified and propagated in a top-down manner, which can be observed in the mean  
307 expression level and temporal fluctuation (based on the rice transcriptome data) of TFs in the generalized  
308 hierarchy, in which TFs in the top layers show lower expression and weaker fluctuations as compared to  
309 the bottom TFs (Fig. [6B](#)). Such evidence implies that differential expression analysis may bias towards  
310 bottom TFs and other downstream target genes which likely have higher transcript abundances and  
311 higher fluctuations that provide the variance necessary to infer signatures of environmental response.

312 We next examined dynamic TF activities after the drought treatment. A transcription factor's activity at  
313 one time point is calculated as the average population coexpression level (PCC) with all of its target  
314 genes at that time point in the static network prior we used above. Therefore, we obtained temporal  
315 activities of TFs at control and drought condition. We filtered the TF pools by removing non-responsive  
316 TF using paired t test ( $p < 0.05$ ) comparing temporal activities of a TF across two conditions (although  
317 this filtering step has only a moderate effect on the results; See Fig [S11](#)). Note that many responsive TFs  
318 do not individually exhibit differential expression between control and drought conditions, suggesting  
319 that many transcriptional regulations can occur without significantly changing the abundance of the  
320 regulators themselves. And, as expected, genes that cannot be detected by differential expression but  
321 are identified as responsive TFs by their activities tend to occur in the upper layers of the TF hierarchy.  
322 Specifically, 7 out of 9 responsive TFs at top layers do not exhibit differential expression at any time  
323 point, while there is only 1 out of 8 responsive TFs showing differential expression. This observation  
324 suggests that there is signal amplification through the transcriptional cascade: higher layer TFs and  
325 master regulators are more likely to control downstream genes without a detectable change in their own  
326 transcript abundances in the data available. Therefore, when analyzing a transcriptome of transcription  
327 factors, contrasting regulatory activities (e.g., using coexpression as we did) under stress and control  
328 condition may be necessary for prioritizing responsive genes because the signal of differential expression  
329 appears to decay along the regulatory hierarchy from top down.

330 Overall, we observed two regulatory waves for temporal activities (Fig. [6C](#)), which were not prominent  
331 in the temporal expression profile considered above (Fig. [6B](#)). We speculate that these two waves may  
332 represent distinct phases rice response to the relatively severe drying imposed, perhaps before and after  
333 turgor loss occurs ([Buckley 2005](#)). We note that Wilkins et al. observed two distinct phases of drying  
334 response with respect to carbon assimilation, with a steep decline in assimilation during the initial phase  
335 followed by a slower decline beginning around the 60th minute following onset of dehydration stress  
336 ([Wilkins et al. 2016](#)). We next clustered short time series of single TF activities with STEM ([Ernst and](#)  
337 [Bar-Joseph 2006](#)), which identifies interactions using unsupervised clustering and, in our data, infers  
338 the occurrence of two regulatory waves along with putative drivers of each wave. We found four distinct  
339 groups of TFs (Fig. [6C](#) insets, Fig. [6D](#) and Fig. [6E](#)). Fig. [6D](#) presents a group of TFs with continuously

340 increasing activity over the time course. Fig. 6E, top left inset of Fig. 6C and bottom right inset of  
341 Fig. 6C show groups driving both waves, the first wave and the second wave alone respectively. The  
342 group of TFs putatively driving the second wave contains two TFs: RR21, from the bottom layer, encodes  
343 a putative response regulator involved in cytokinin signaling (Tsai et al. 2012), while GL1A, from the  
344 top layer, encodes an ortholog of the Arabidopsis R2R3 MYB transcription factor GL1 (Zheng et al.  
345 2021). A cascade of TFs representing the shortest path between these two TFs were identified in the  
346 TF-only network prior (Fig. 6C), showing how regulatory signals are propagated through the network. In  
347 summary, instead of temporal correlation, examining population level coexpression afford us opportunity  
348 to track the evolving regulatory activity following perturbation.

## 349 4 DISCUSSION

350 Many regulatory interactions in TRNs, and thus co-expression relationships inferred from genome-  
351 scale gene expression measures, are context-dependent (Dunlop et al. 2008, Luscombe et al. 2004).  
352 Environmental cues can affect the behavior of regulators by, e.g., changing their abundance or their  
353 binding affinity to target DNA sequences, and thereby change their regulatory interactions with other  
354 genes and possibly effect whole-organismal response. For instance, an interaction can be inactive simply  
355 because the concentration of the regulator is outside its effective range for the target (Dunlop et al.  
356 2008). Notably, even if a regulatory interaction is activated, its regulatory activity can be low as the  
357 dose-response curve may be under a saturated regime in which additional units of the regulator do not  
358 result in changed activity of its target(s). Alternatively, interactions may be inactive as a result of the  
359 chromatin state of target genes, the post-translational modification of the regulator itself, the presence of  
360 inhibitory factors, or the absence of co-factors (Toledo and Wahl 2006, Piggot and Hilbert 2004). While  
361 these fundamental features of gene regulation are widely appreciated, it is less often considered how  
362 such transient processes may confound ecological studies, or how they might be exploited to enhance the  
363 interpretative value of the types of transcriptomic datasets now routinely generated by ecologists and  
364 evolutionary biologists, which is a central motivation for our study.

365 Studies in human disease and plant and animal stress response frequently use genome-wide gene expression  
366 data to study changes in co-expression changes and network rewiring in response to environmental  
367 perturbation (Fukushima 2013, Southworth et al. 2009, de la Fuente 2010, Amar et al. 2013, Choi et al.  
368 2005, Kostka and Spang 2004, Deng et al. 2015, Yan et al. 2019, Cho et al. 2009, Fukushima et al.  
369 2012, de la Fuente 2010, Zeisel et al. 2015, Bhar et al. 2013, Fiannaca et al. 2015). Ultimately, the  
370 objective of these studies is to identify the genetic and molecular basis of environmental responses as  
371 a means to parameterize models of molecular evolution (Wray et al. 2003), to identify the molecular  
372 genetic basis of evolutionary adaptation (Cheviron et al. 2012, Garfield et al. 2013, Carvallo et al. 2011),  
373 to understand abnormal regulation in disease states, and to design medical interventions (Southworth  
374 et al. 2009, de la Fuente 2010, Amar et al. 2013, Kostka and Spang 2004) and breeding strategies  
375 (Fukushima et al. 2012). However, many past studies have relied on population-level statistics to identify

376 differential gene-gene interactions (Cortijo et al. 2020, Fukushima et al. 2012, Deng et al. 2015, Lea et al.  
377 2019). While statistically straightforward, such widely used population-based methods likely miss many  
378 dynamic interactions which drive the organismal response, thereby generating an incomplete picture of  
379 these complex systems. First, without a static transcriptional network prior, generating a pairwise gene  
380 co-expression network and detecting responsive links can lead to false positives as many of links may be  
381 indirect and not involve any causal regulatory relationship (Feizi et al. 2013, Barzel and Barabási 2013).  
382 Second, population-level statistics are often confounded by individual covariates such as genotype, age,  
383 and sex (Parsana et al. 2019, Lea et al. 2019). Third, even within an isogenic homogeneous population,  
384 cross sectional population correlations may be confounded by switch-like transitions and ultrasensitivity  
385 in gene regulation, thereby failing to characterize the dynamic network rewiring (Fig. 3 and Fig. 4). By  
386 contrast, temporal correlation can fail to identify real-time regulatory activity (Fig. 4).

387 In the present study, we implemented a stochastic simulation of a simple regulatory model under two  
388 perturbation regimes. We show that, under a cooperative binding mode (Hill coefficient  $n > 1$ , indicating  
389 that early-acting TFs enhance bindings of TFs that come later), the population-level co-expression changes  
390 of an environmentally induced link depend upon whether the gene regulation is under a saturated regime  
391 or not. That is to say, differential population coexpression is neither powerful nor robust in detecting  
392 responsive links. Our results also indicate that while population-level correlations may be confounded  
393 by saturated regulation, temporal correlations of gene expression time series are robust under both  
394 saturated and unsaturated regimes. Hence, while temporal co-expression tends to be coherent upon  
395 environmental perturbation, whether the co-expression measured using population statistics becomes  
396 coherent or decoherent may depend upon the specific parameters of a given gene pair and the environmental  
397 condition. That such potential temporal bias can occur when using cross-sectional data (i.e., population-  
398 level correlation) has been established in the medical literature (Yuan et al. 2021). Notably, by measuring  
399 the activity of 6500 designed promoters using a fluorescence reporter, van Dijk and colleagues (van  
400 Dijk et al. 2017) found that the activities of the target promoters can become saturated with increasing  
401 abundance of the active form of TFs, and that the pattern becomes more pronounced with more binding  
402 sites or higher binding affinity.

403 Plant responses to environmental stressors are physiologically complex (Bohnert et al. 1995) and often  
404 context-dependent and species-specific (Bouzid et al. 2019). Importantly, we found that temporal bias  
405 is prominent under heat stress, whereas under drought stress, such bias is not. Furthermore, when  
406 removing other covariates (genotypic variation), drought treatments lead to clear patterns of regulatory  
407 coherence and increasing phenotypic integration when assessing population correlations, which suggests  
408 that regulatory saturation is relatively less common during drought response. We reason that such a  
409 distinct pattern reflects the varying etiology of response to different stressors and is largely attributable to  
410 the internal environment an organism experienced during stress onset: drying is a fairly gradual process  
411 internally, while the heat treatment is a shock – particularly as often implemented in laboratory settings –  
412 and a more rapid onset process for an organism. Therefore, we suspect that the drought response is under  
413 an unsaturated regime in the rice data studied here and is relatively mild compared to the heat response.

414 On the contrary, the heat shock treatment is intense and thereby possibly under a saturated regulatory  
415 regime in the rice data. Environmental responses that show regulatory saturation may not have been  
416 optimized by natural selection: rapid heat shock of the type often imposed in the laboratory setting is  
417 likely rare in the wild. Further analysis is needed to examine to what extent this type of saturated  
418 regulatory regime is present in real data.

419 Our observation that co-expression increases with the onset of two stresses in rice is seemingly inconsistent  
420 with a recent study which used gene expression data collected from human monocytes to infer population  
421 correlation among transcripts (Lea et al. 2019). Several other population-level studies have likewise  
422 reported that environmental perturbation may lead to declining co-expression (Southworth et al. 2009,  
423 Anglani et al. 2014, Tanner et al. 2022). From a quantitative genetic perspective, a commonly observed  
424 result is that phenotypic integration in a population (i.e., the number and strength of significant correlations  
425 among traits) increases with environmental stress (Waitt and Levin 1993, Schlichting 1989, Gianoli 2004,  
426 García-Verdugo et al. 2009). However, stress-induced decanalization theory (Gibson 2009) suggests that  
427 new mutations or stressful environments may disrupt fine-tuned connections in a transcriptional network  
428 (Lea et al. 2019). Notably, decanalization has been hypothesized to explain complex traits and human  
429 disease (Hu et al. 2016). The degree of stress imposed on the system may dictate whether coherence (or  
430 integration) as opposed to decoherence is observed. A possible reconciliation between our results and  
431 the decoherence reported by Lea et al, may be that the monocytes studied by Lea et al. experienced a  
432 relatively more stressful environment than the rice plants studied by Wilkins et al. Indeed, we recently  
433 showed that trait co-variances vary considerably along a single environmental index (Monroe et al. 2021),  
434 suggesting that genome-scale regulatory interactions likely transition from coherent to decoherent along  
435 such axes. Such gradients of response should be carefully considered during the design of experiments  
436 (Poorter et al. 2016).

## 437 5 Competing Interests

438 The authors declare that they have no competing interests

## 439 6 Data Accessibility Statement

440 The RNA-seq data were retrieved from the Gene Expression Omnibus ([www.ncbi.nlm.nih.gov/geo/](http://www.ncbi.nlm.nih.gov/geo/))  
441 under accession number GSE74793.

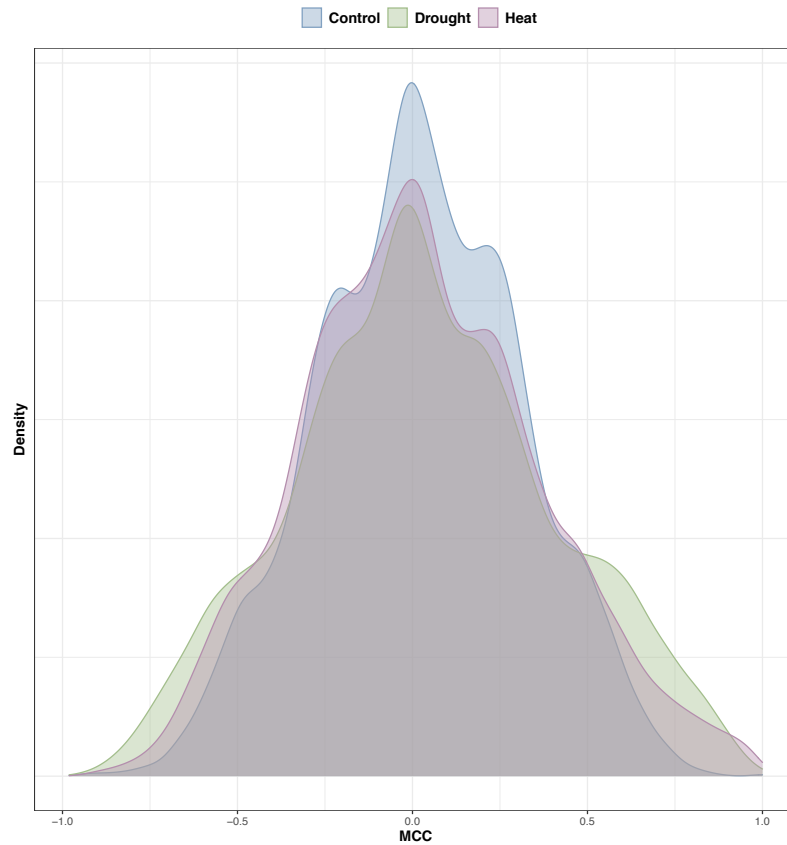

442

443 **Figure 1: Temporal correlations under multiple environmental conditions show regulatory**  
444 **coherence** Temporal correlation is calculated as the Max Cross Correlation (with lag  $\leq 1$ , see Methods)  
445 for each pair of transcripts, using a previously constructed static network prior. The data comprise  
446 four rice cultivars grown under control, dehydration stress, or elevated temperature conditions, and here  
447 we analyze the data by condition over a time duration of 135 minutes following the incidence of stress.  
448 Calculated Maximum Cross Correlations (MCC) from all four cultivars were merged stress-wise.

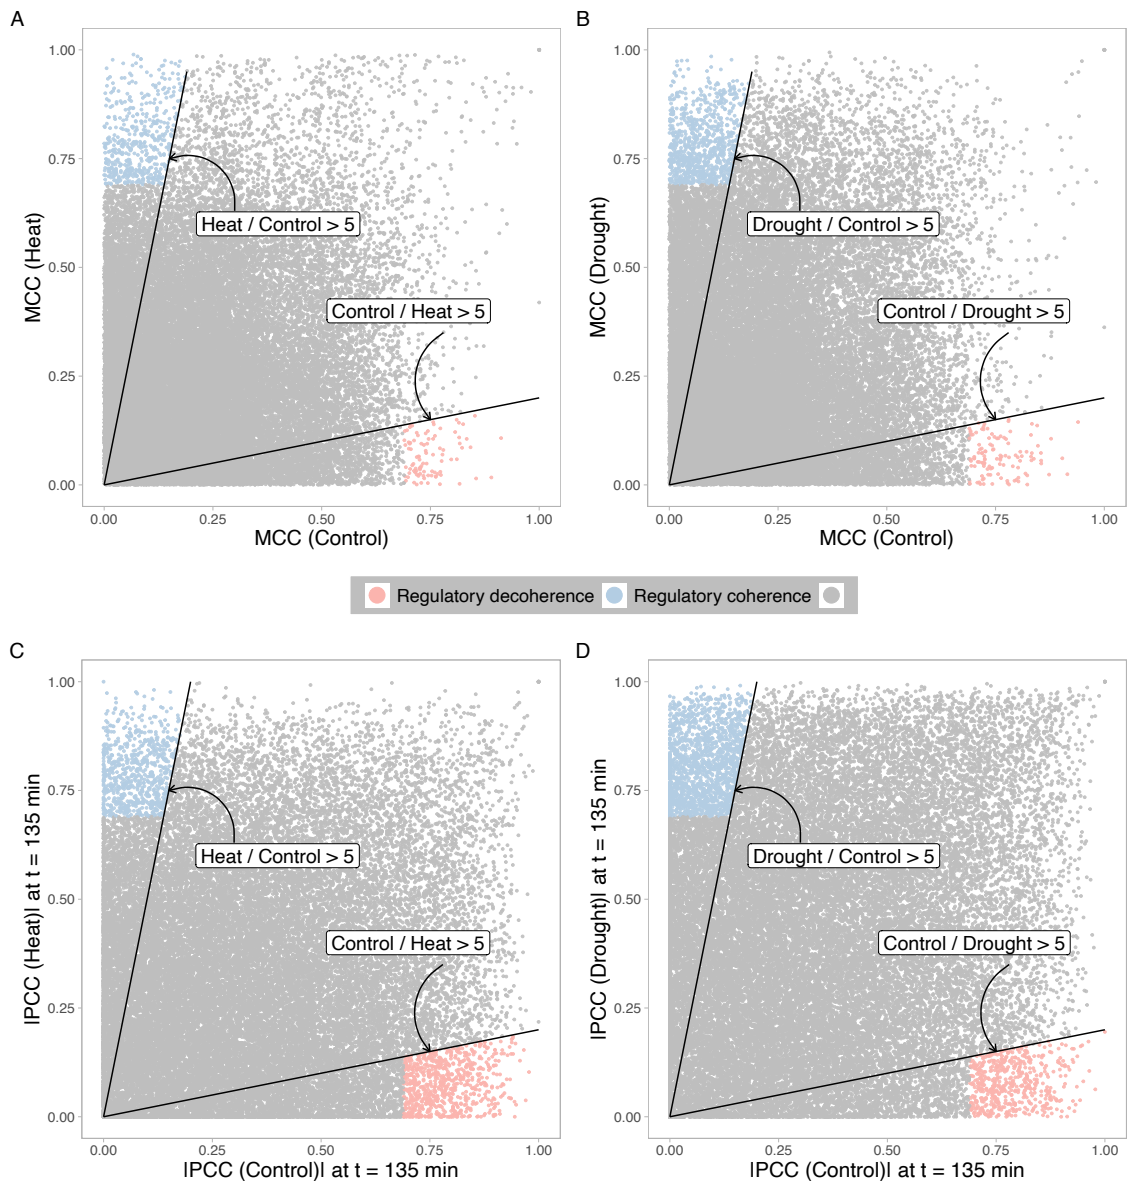

450

451 **Figure 2: Environmental perturbations lead to contrasting patterns using temporal and**  
 452 **population correlation. A.** Comparison of the temporal correlation (Max Cross Correlation, MCC) for  
 453 each regulator-target pair under control condition against heat condition. **B.** Comparison of the temporal  
 454 correlation (MCC) for each regulator-target pair under control condition against soil drying condition.  
 455 **C.** and **D.** show the Pearson Correlation Coefficient (PCC) of each regulator-target pair at 135 min  
 456 after heat (**C**) and drought (**D**) treatment. The regulator-target pairs that are not significant in both  
 457 conditions are in grey, for which the cutoff is 0.69 ( $p$ -value = 0.01). Red and blue labels highlight the  
 458 pairs that show regulatory decoherence and regulatory coherence, respectively. Solid lines indicate that  
 459 the ratio between regulatory scores under control and perturbed conditions is larger than 5.



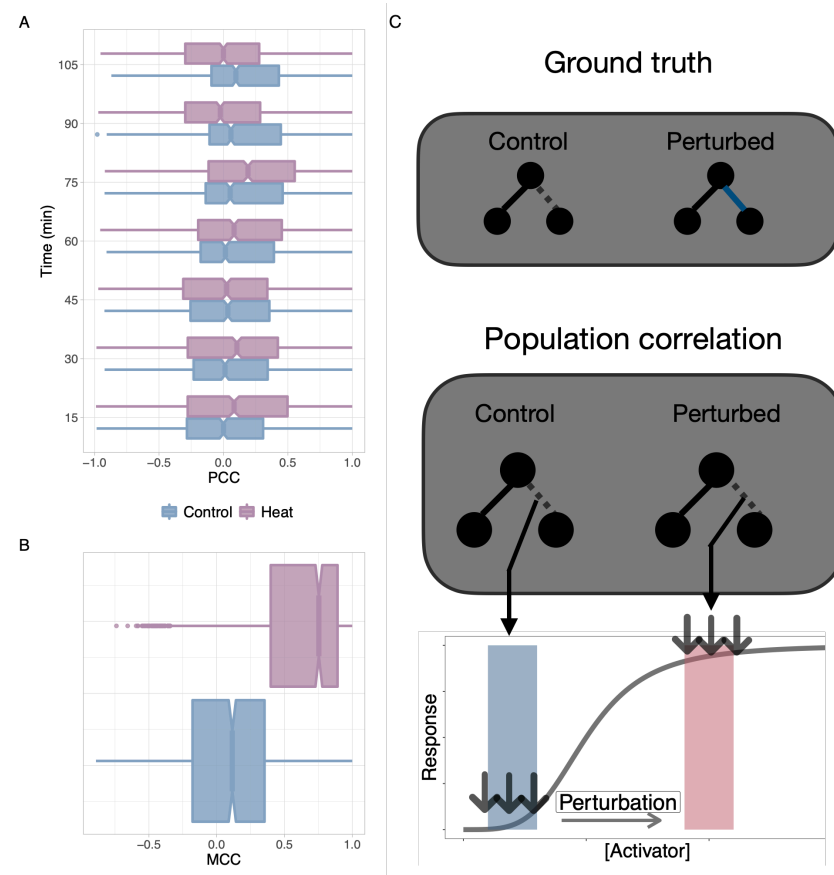

461

462 **Figure 3: Heat shock regulon shows strong contrasting patterns upon heat shock treatment.**  
463 **A.** Pearson Correlation Coefficient (PCC) under control and heat condition within heat shock regulon  
464 over the time course. Each boxplot represents the distribution of PCC under a given time and treatment.  
465 **B.** Max Cross Correlation (MCC) within the heat shock regulon. Genes in the heat shock regulon are  
466 identified by extracting links that include a regulator from the Heat Shock Family (HSF). As a family,  
467 HSFs have been demonstrated previously to show an important role in regulating genome-wide responses  
468 to elevated temperature in diverse species (Wang et al. 2004, Ohama et al. 2017). **C.** A schematic diagram  
469 depicts possible explanation of the temporal bias through regulatory saturation. The blue link is activated  
470 upon the perturbation (ground truth) by increasing the concentration of the regulator (an activator).  
471 However, if the dose-response curve is a sigmoid shape function, chances are the population correlation  
472 may not be able to detect such activation.

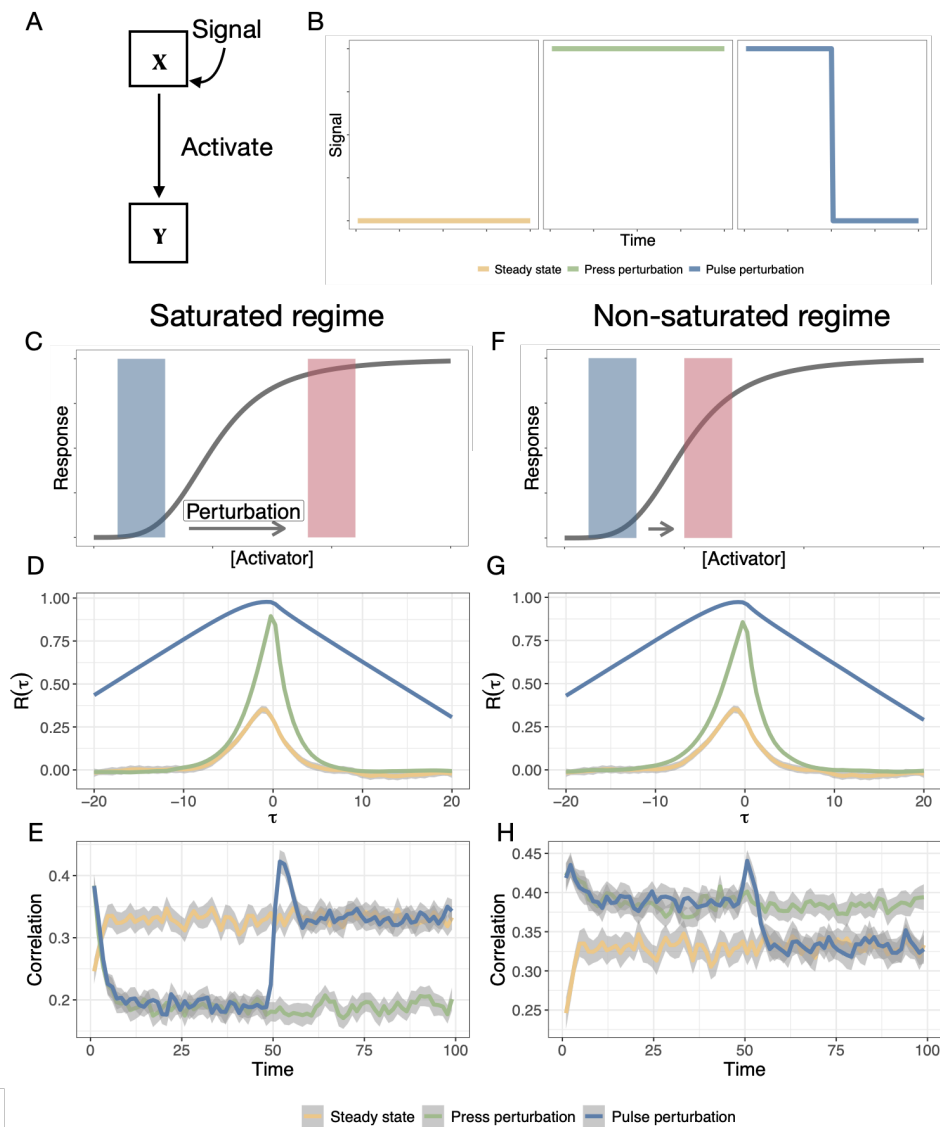

474

475 **Figure 4: Illustrated examples through stochastic simulation indicate the robustness of**  
 476 **using temporal correlation to detect regulatory coherence.** The population level correlation  
 477 may lead to temporal bias in detecting regulatory coherence depending on the regulatory regime. **A.** A  
 478 schematic illustration of the minimal activation model explored here and **B.** input signals corresponding  
 479 to three perturbation scenarios. **C - E.** The cross correlation function and population-level correlation  
 480 between activator  $X$  and target  $Y$  under a saturated regime. The cross correlation function robustly  
 481 reveals a peak in response to perturbations while the perturbation may lead to reduction of correlation  
 482 when using population correlation over the time course. **F - H.** The cross correlation function and  
 483 population-level correlation between activator  $X$  and target  $Y$  under a non-saturated regime. Under a  
 484 non-saturated regime, both the population correlation and the temporal correlation can detect elevated  
 485 level of coexpression. Colors represent three different types of external environmental conditions which  
 486 lead to internal signaling (Steady state, press perturbation, and pulse perturbation).  $R(\tau)$  is the cross  
 487 correlation function with  $\tau$  indicating the time delay. Note that the perturbation is imposed at  $t = 0$  in  
 488 **E** and **H**.

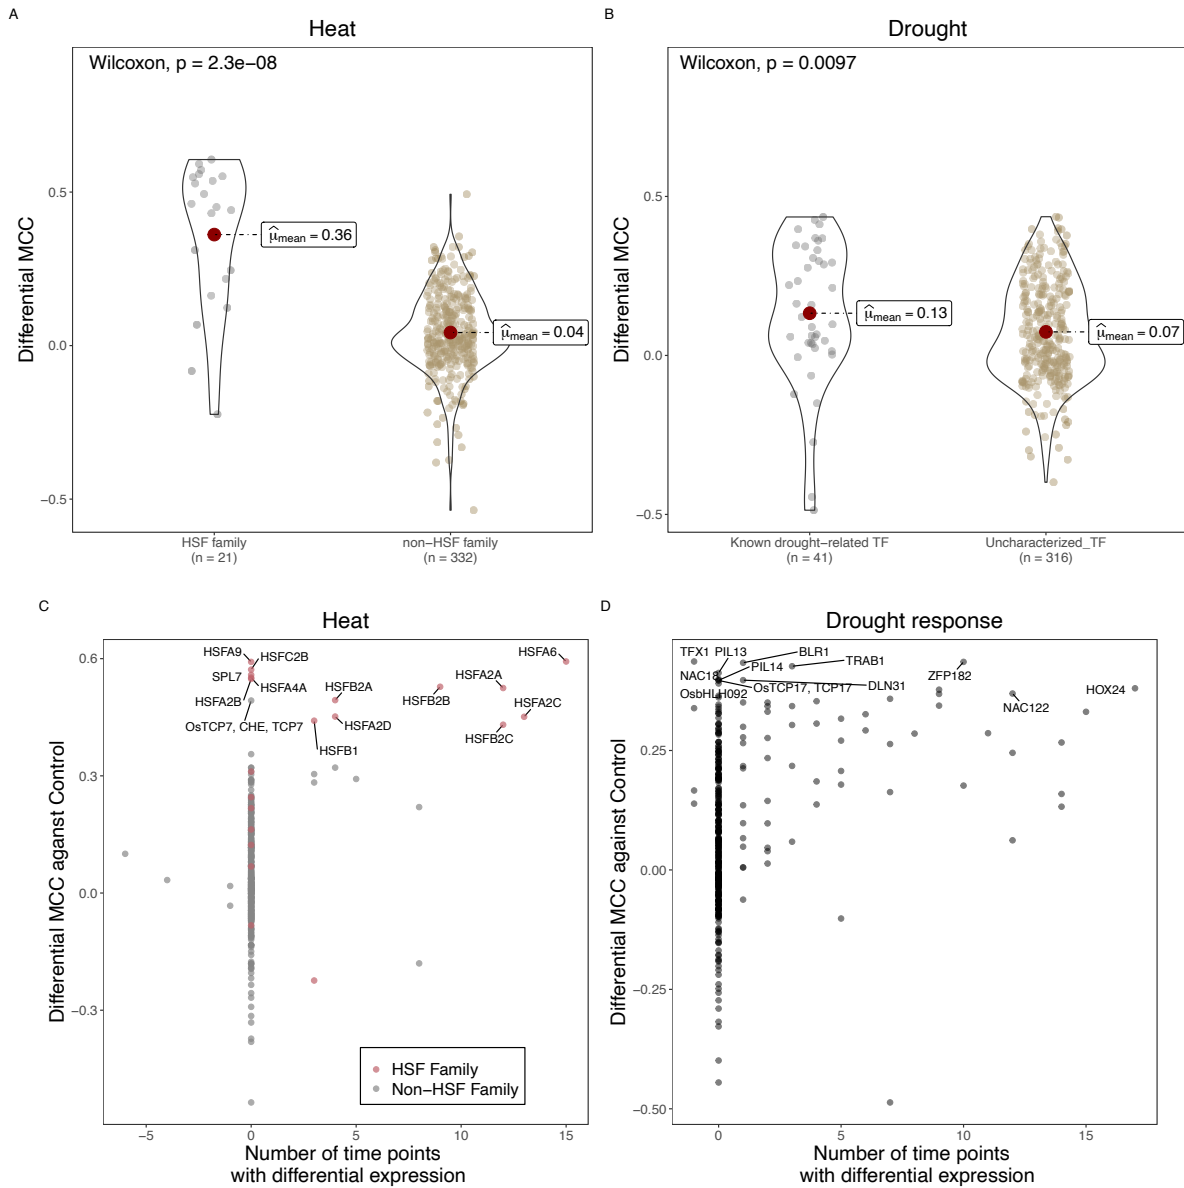

490

491 **Figure 5: Temporal correlation reveals putative key regulators of stress response. A.** The  
 492 average differential Max Correlation Coefficient (MCC) for each regulator in the network prior under heat  
 493 condition. Violin plots show members of the HSF family TF and non-HSF family TF, respectively. **B.**  
 494 The average differential MCC for each regulator in the network prior under drought condition. Known  
 495 drought-related TFs were obtained from <https://funricegenes.github.io/>, where genes linked with  
 496 keywords “drought”, “ABA”, and “drought tolerance” were extracted. The average differential MCC  
 497 is calculated as the averaged MCC changed across conditions. The comparison of heat **C.** and drought  
 498 **D.** differential expression (the number of time points showing differential expression from the original  
 499 Wilkins et al. analysis) versus differential MCC. Salmon points denote the Heat Shock Family (HSF)  
 500 regulators. The number of time points with differential expression is counted for each time point and  
 501 each genotypes (Maximum number is  $4 * 16 = 64$ ). Negative numbers on the x-axis indicate number of  
 502 time points in which the gene was observed to be downregulated as compared to control conditions.  
 503

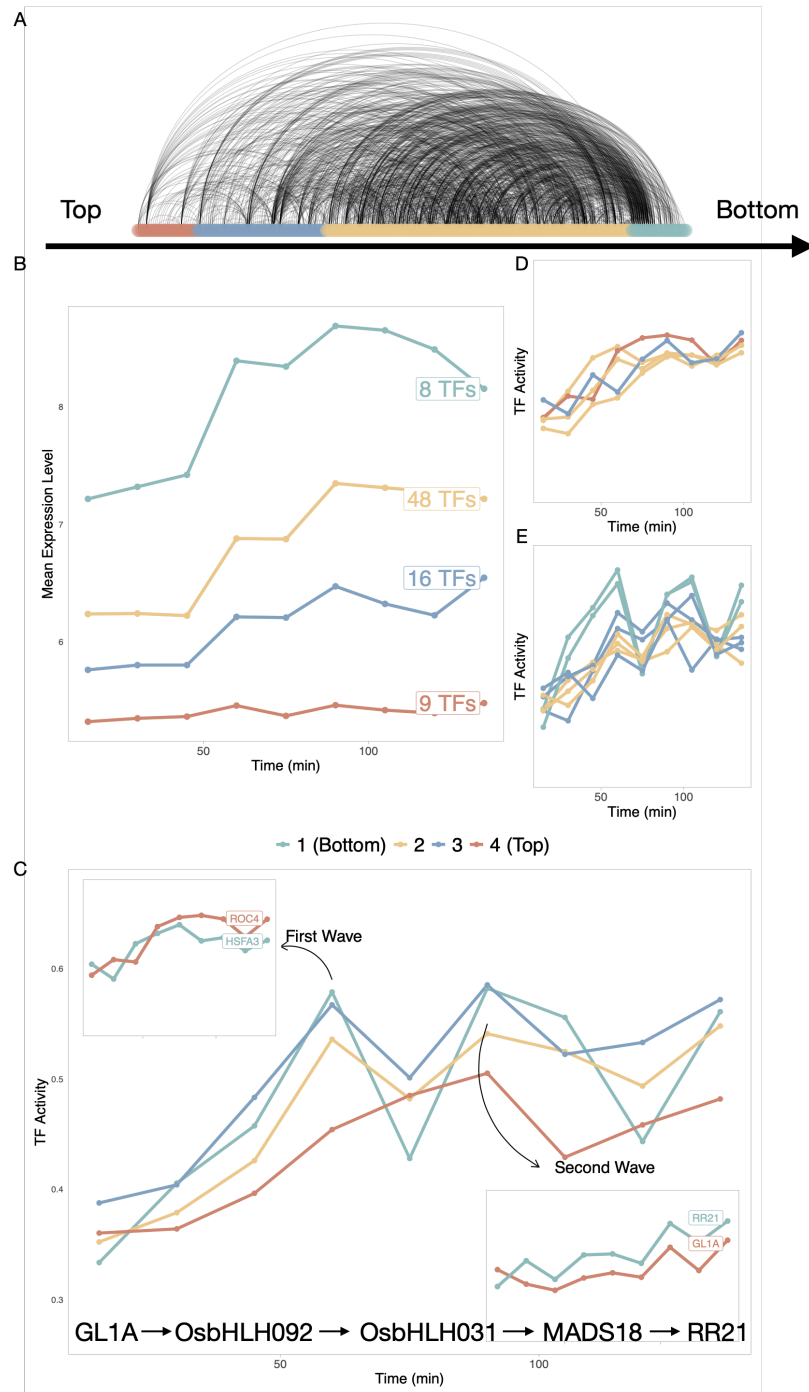

504

505 **Figure 6: Population correlation over time characterizing the dynamics of Transcription**  
 506 **Factor activities under dehydration in a regulatory network hierarchy. A.** The hierarchical  
 507 structure of the network prior constructed by a generalized bottom-up approach. Each curve represents a  
 508 regulatory interaction in the network prior. The color indicates the level of a Transcription Factor (TF)  
 509 in the hierarchy from top (left) to bottom (right) **B.** Comparison of mean expression value of responsive  
 510 TFs in the network hierarchy. The label of each line shows the number of TFs within each level. **C.**  
 511 Dynamic TF activities calculated by average population Pearson Correlation Coefficients of a TF with all  
 512 its target genes. Two waves of TF activity can be observed; we thus clustered all the TF's activity within  
 513 the hierarchy over time with the assistant of STEM (Ernst and Bar-Joseph 2006). Four distinct patterns  
 514 are shown: 1) Continuously increasing **D**; 2). Driving both two waves (**E**); 3) and 4) are two groups of  
 515 TFs drive the first and second regulatory wave separately **Insets.** of **C.** The shortest path in the **C**  
 516 shows the regulatory cascade driving the second regulatory wave.

## References

- Alon, U., 2019. An introduction to systems biology: design principles of biological circuits. CRC press.
- Alonso-Blanco, C., Gomez-Mena, C., Llorente, F., Koornneef, M., Salinas, J., and Martínez-Zapater, J. M. 2005. Genetic and molecular analyses of natural variation indicate *cbf2* as a candidate gene for underlying a freezing tolerance quantitative trait locus in *arabidopsis*. *Plant physiology* 139:1304–1312.
- Alvarez-Fernandez, R., Penfold, C. A., Galvez-Valdivieso, G., Exposito-Rodriguez, M., Stallard, E. J., Bowden, L., Moore, J. D., Mead, A., Davey, P. A., Matthews, J. S., et al. 2020. Time series transcriptomics reveals a *bbx32*-directed control of dynamic acclimation to high light in mature *arabidopsis* leaves. *bioRxiv* .
- Amar, D., Safer, H., and Shamir, R. 2013. Dissection of regulatory networks that are altered in disease via differential co-expression. *PLoS computational biology* 9.
- Anglani, R., Creanza, T. M., Liuzzi, V. C., Piepoli, A., Panza, A., Andriulli, A., and Ancona, N. 2014. Loss of connectivity in cancer co-expression networks. *PloS one* 9.
- Bar-Joseph, Z., Gitter, A., and Simon, I. 2012. Studying and modelling dynamic biological processes using time-series gene expression data. *Nature Reviews Genetics* 13:552–564.
- Barzel, B. and Barabási, A.-L. 2013. Network link prediction by global silencing of indirect correlations. *Nature biotechnology* 31:720–725.
- Bechtold, U., Penfold, C. A., Jenkins, D. J., Legaie, R., Moore, J. D., Lawson, T., Matthews, J. S., Violet-Chabrand, S. R., Baxter, L., Subramaniam, S., et al. 2016. Time-series transcriptomics reveals that *agamous-like22* affects primary metabolism and developmental processes in drought-stressed *arabidopsis*. *The Plant Cell* 28:345–366.
- Bhar, A., Haubrock, M., Mukhopadhyay, A., Maulik, U., Bandyopadhyay, S., and Wingender, E. 2013. Coexpression and coregulation analysis of time-series gene expression data in estrogen-induced breast cancer cell. *Algorithms for molecular biology* 8:1–11.
- Bhattacharjee, A., Srivastava, P. L., Nath, O., and Jain, M. 2021. Genome-wide discovery of *oshox24*-binding sites and regulation of desiccation stress response in rice. *Plant Molecular Biology* 105:205–214.
- Blüthgen, N., Legewie, S., Herzel, H., and Kholodenko, B., 2007. Mechanisms generating ultrasensitivity, bistability, and oscillations in signal transduction. Pages 282–299 *in* *Introduction to Systems Biology*. Springer.
- Bohnert, H. J., Nelson, D. E., and Jensen, R. G. 1995. Adaptations to environmental stresses. *The plant cell* 7:1099.
- Bouzig, M., He, F., Schmitz, G., Häusler, R., Weber, A., Mettler-Altmann, T., and De Meaux, J. 2019. *Arabidopsis* species deploy distinct strategies to cope with drought stress. *Annals of botany* 124:27–40.
- Bradshaw, A. D. 1965. Evolutionary significance of phenotypic plasticity in plants. *Advances in genetics* 13:115–155.
- Briat, C., Gupta, A., and Khammash, M. 2016. Antithetic integral feedback ensures robust perfect adaptation in noisy biomolecular networks. *Cell systems* 2:15–26.
- Buchanan, M., Caldarelli, G., De Los Rios, P., Rao, F., and Vendruscolo, M., 2010. *Networks in cell biology*. Cambridge University Press.
- Buckley, T. N. 2005. The control of stomata by water balance. *New phytologist* 168:275–292.
- Carroll, S. B. 2008. Evo-devo and an expanding evolutionary synthesis: a genetic theory of morphological evolution. *Cell* 134:25–36.
- Carvalho, M. A., Pino, M.-T., Jeknić, Z., Zou, C., Doherty, C. J., Shiu, S.-H., Chen, T. H., and Thomashow, M. F. 2011. A comparison of the low temperature transcriptomes and *cbf* regulons of three plant species that differ in freezing tolerance: *Solanum commersonii*, *solanum tuberosum*, and *arabidopsis thaliana*. *Journal of experimental botany* 62:3807–3819.

- Chapin, F. S. 1991. Integrated responses of plants to stress. *BioScience* 41:29–36.
- Cheviron, Z. A., Bachman, G. C., Connaty, A. D., McClelland, G. B., and Storz, J. F. 2012. Regulatory changes contribute to the adaptive enhancement of thermogenic capacity in high-altitude deer mice. *Proceedings of the national academy of sciences* 109:8635–8640.
- Cho, S. B., Kim, J., and Kim, J. H. 2009. Identifying set-wise differential co-expression in gene expression microarray data. *BMC bioinformatics* 10:109.
- Choi, J. K., Yu, U., Yoo, O. J., and Kim, S. 2005. Differential coexpression analysis using microarray data and its application to human cancer. *Bioinformatics* 21:4348–4355.
- Chu, D., Zabet, N. R., and Mitavskiy, B. 2009. Models of transcription factor binding: sensitivity of activation functions to model assumptions. *Journal of Theoretical Biology* 257:419–429.
- Cortijo, S., Bhattarai, M., Locke, J. C., and Ahnert, S. E. 2020. Co-expression networks from gene expression variability between genetically identical seedlings can reveal novel regulatory relationships. *Frontiers in plant science* 11.
- de la Fuente, A. 2010. From ‘differential expression’ to ‘differential networking’—identification of dysfunctional regulatory networks in diseases. *Trends in genetics* 26:326–333.
- Deng, S.-P., Zhu, L., and Huang, D.-S., 2015. Mining the bladder cancer-associated genes by an integrated strategy for the construction and analysis of differential co-expression networks. *in* *BMC genomics*, volume 16, page S4. BioMed Central.
- Des Marais, D. L., Hernandez, K. M., and Juenger, T. E. 2013. Genotype-by-environment interaction and plasticity: exploring genomic responses of plants to the abiotic environment. *Annual Review of Ecology, Evolution, and Systematics* 44:5–29.
- Des Marais, D. L., McKay, J. K., Richards, J. H., Sen, S., Wayne, T., and Juenger, T. E. 2012. Physiological genomics of response to soil drying in diverse arabidopsis accessions. *The Plant Cell* 24:893–914.
- Dunlop, M. J., Cox, R. S., Levine, J. H., Murray, R. M., and Elowitz, M. B. 2008. Regulatory activity revealed by dynamic correlations in gene expression noise. *Nature genetics* 40:1493–1498.
- Ernst, J. and Bar-Joseph, Z. 2006. Stem: a tool for the analysis of short time series gene expression data. *BMC bioinformatics* 7:1–11.
- Feizi, S., Marbach, D., Médard, M., and Kellis, M. 2013. Network deconvolution as a general method to distinguish direct dependencies in networks. *Nature biotechnology* 31:726–733.
- Ferrari, C., Proost, S., Ruprecht, C., and Mutwil, M. 2018. Phytonet: comparative co-expression network analyses across phytoplankton and land plants. *Nucleic acids research* 46:W76–W83.
- Fiannaca, A., La Rosa, M., La Paglia, L., Rizzo, R., and Urso, A. 2015. Analysis of mirna expression profiles in breast cancer using biclustering. *BMC bioinformatics* 16:1–11.
- Fu, X., Sun, Y., Wang, J., Xing, Q., Zou, J., Li, R., Wang, Z., Wang, S., Hu, X., Zhang, L., et al. 2014. Sequencing-based gene network analysis provides a core set of gene resource for understanding thermal adaptation in z hikong scallop c hlamys farreri. *Molecular Ecology Resources* 14:184–198.
- Fukao, T., Yeung, E., and Bailey-Serres, J. 2011. The submergence tolerance regulator sub1a mediates crosstalk between submergence and drought tolerance in rice. *The Plant Cell* 23:412–427.
- Fukushima, A. 2013. Diffcorr: an r package to analyze and visualize differential correlations in biological networks. *Gene* 518:209–214.
- Fukushima, A., Nishizawa, T., Hayakumo, M., Hikosaka, S., Saito, K., Goto, E., and Kusano, M. 2012. Exploring tomato gene functions based on coexpression modules using graph clustering and differential coexpression approaches. *Plant physiology* 158:1487–1502.
- Gao, Q., Ho, C., Jia, Y., Li, J. J., and Huang, H. 2012. Bi c lustering of li near p atterns in gene expression data. *Journal of Computational Biology* 19:619–631.

- García-Verdugo, C., Granado-Yela, C., Manrique, E., Rubio de Casas, R., and Balaguer, L. 2009. Phenotypic plasticity and integration across the canopy of *olea europaea* subsp. *guanchica* (oleaceae) in populations with different wind exposures. *American Journal of Botany* 96:1454–1461.
- Garfield, D. A., Runcie, D. E., Babbitt, C. C., Haygood, R., Nielsen, W. J., and Wray, G. A. 2013. The impact of gene expression variation on the robustness and evolvability of a developmental gene regulatory network. *PLoS biology* 11:e1001696.
- Gargouri, M., Park, J.-J., Holguin, F. O., Kim, M.-J., Wang, H., Deshpande, R. R., Shachar-Hill, Y., Hicks, L. M., and Gang, D. R. 2015. Identification of regulatory network hubs that control lipid metabolism in *chlamydomonas reinhardtii*. *Journal of experimental botany* 66:4551–4566.
- Gerstein, M. B., Kundaje, A., Hariharan, M., Landt, S. G., Yan, K.-K., Cheng, C., Mu, X. J., Khurana, E., Rozowsky, J., Alexander, R., et al. 2012. Architecture of the human regulatory network derived from encode data. *Nature* 489:91–100.
- Gianoli, E. 2004. Plasticity of traits and correlations in two populations of *convolvulus arvensis* (convolvulaceae) differing in environmental heterogeneity. *International Journal of Plant Sciences* 165:825–832.
- Gianoli, E. and Palacio-López, K. 2009. Phenotypic integration may constrain phenotypic plasticity in plants. *Oikos* 118:1924–1928.
- Gibert, P., Debat, V., and Ghalambor, C. K. 2019. Phenotypic plasticity, global change, and the speed of adaptive evolution. *Current opinion in insect science* 35:34–40.
- Gibson, G. 2008. The environmental contribution to gene expression profiles. *Nature reviews genetics* 9:575–581.
- Gibson, G. 2009. Decanalization and the origin of complex disease. *Nature Reviews Genetics* 10:134–140.
- Gillespie, D. T. 1977. Exact stochastic simulation of coupled chemical reactions. *The journal of physical chemistry* 81:2340–2361.
- Greenham, K., Guadagno, C. R., Gehan, M. A., Mockler, T. C., Weing, C., Ewers, B. E., and McClung, C. R. 2017. Temporal network analysis identifies early physiological and transcriptomic indicators of mild drought in *brassica rapa*. *Elife* 6:e29655.
- Hirata, H., Yoshiura, S., Ohtsuka, T., Bessho, Y., Harada, T., Yoshikawa, K., and Kageyama, R. 2002. Oscillatory expression of the bhlh factor *hes1* regulated by a negative feedback loop. *Science* 298:840–843.
- Horn, P. J., Liu, J., Cocuron, J.-C., McGlew, K., Thrower, N. A., Larson, M., Lu, C., Alonso, A. P., and Ohlrogge, J. 2016. Identification of multiple lipid genes with modifications in expression and sequence associated with the evolution of hydroxy fatty acid accumulation in *physaria fendleri*. *The Plant Journal* 86:322–348.
- Hu, J. X., Thomas, C. E., and Brunak, S. 2016. Network biology concepts in complex disease comorbidities. *Nature Reviews Genetics* 17:615.
- Huang, J., Sun, S., Xu, D., Lan, H., Sun, H., Wang, Z., Bao, Y., Wang, J., Tang, H., and Zhang, H. 2012. A tffiii-type zinc finger protein confers multiple abiotic stress tolerances in transgenic rice (*oryza sativa* l.). *Plant molecular biology* 80:337–350.
- Joshi, R., Wani, S. H., Singh, B., Bohra, A., Dar, Z. A., Lone, A. A., Pareek, A., and Singla-Pareek, S. L. 2016. Transcription factors and plants response to drought stress: current understanding and future directions. *Frontiers in Plant Science* 7:1029.
- Kostka, D. and Spang, R. 2004. Finding disease specific alterations in the co-expression of genes. *Bioinformatics* 20:i194–i199.
- Langfelder, P. and Horvath, S. 2008. Wgcna: an r package for weighted correlation network analysis. *BMC bioinformatics* 9:559.

- Lea, A., Subramaniam, M., Ko, A., Lehtimäki, T., Raitoharju, E., Kähönen, M., Seppälä, I., Mononen, N., Raitakari, O. T., Ala-Korpela, M., et al. 2019. Genetic and environmental perturbations lead to regulatory decoherence. *eLife* 8:e40538.
- Lewis, J. 2003. Autoinhibition with transcriptional delay: a simple mechanism for the zebrafish somitogenesis oscillator. *Current Biology* 13:1398–1408.
- Love, M. I., Huber, W., and Anders, S. 2014. Moderated estimation of fold change and dispersion for rna-seq data with *DESeq2*. *Genome biology* 15:1–21.
- Luscombe, N. M., Babu, M. M., Yu, H., Snyder, M., Teichmann, S. A., and Gerstein, M. 2004. Genomic analysis of regulatory network dynamics reveals large topological changes. *Nature* 431:308–312.
- Ma, W., Trusina, A., El-Samad, H., Lim, W. A., and Tang, C. 2009. Defining network topologies that can achieve biochemical adaptation. *Cell* 138:760–773.
- Manna, M., Thakur, T., Chirom, O., Mandlik, R., Deshmukh, R., and Salvi, P. 2020. Transcription factors as key molecular target to strengthen the drought stress tolerance in plants. *Physiologia Plantarum* .
- Martín-Trillo, M. and Cubas, P. 2010. *Tcp* genes: a family snapshot ten years later. *Trends in plant science* 15:31–39.
- Monaco, G., van Dam, S., Ribeiro, J. L. C. N., Larbi, A., and de Magalhães, J. P. 2015. A comparison of human and mouse gene co-expression networks reveals conservation and divergence at the tissue, pathway and disease levels. *BMC evolutionary biology* 15:1–14.
- Monroe, J., Cai, H., and Des Marais, D. L. 2021. Diversity in non-linear responses to soil moisture shapes evolutionary constraints in *brachypodium*. *G3 Genes| Genomes| Genetics* .
- Nakamura, Y., Kato, T., Yamashino, T., Murakami, M., and Mizuno, T. 2007. Characterization of a set of phytochrome-interacting factor-like bhlh proteins in *oryza sativa*. *Bioscience, Biotechnology, and Biochemistry* 71:1183–1191.
- Nicotra, A. B., Atkin, O. K., Bonser, S. P., Davidson, A. M., Finnegan, E. J., Mathesius, U., Poot, P., Purugganan, M. D., Richards, C. L., Valladares, F., et al. 2010. Plant phenotypic plasticity in a changing climate. *Trends in plant science* 15:684–692.
- Ohama, N., Sato, H., Shinozaki, K., and Yamaguchi-Shinozaki, K. 2017. Transcriptional regulatory network of plant heat stress response. *Trends in plant science* 22:53–65.
- Oostra, V., Saastamoinen, M., Zwaan, B. J., and Wheat, C. W. 2018. Strong phenotypic plasticity limits potential for evolutionary responses to climate change. *Nature communications* 9:1–11.
- Palakurty, S. X., Stinchcombe, J. R., and Afkhami, M. E. 2018. Cooperation and coexpression: how coexpression networks shift in response to multiple mutualists. *Molecular ecology* 27:1860–1873.
- Parsana, P., Ruberman, C., Jaffe, A. E., Schatz, M. C., Battle, A., and Leek, J. T. 2019. Addressing confounding artifacts in reconstruction of gene co-expression networks. *Genome biology* 20:1–6.
- Piggot, P. J. and Hilbert, D. W. 2004. Sporulation of *bacillus subtilis*. *Current opinion in microbiology* 7:579–586.
- Pigliucci, M. 2003. Phenotypic integration: studying the ecology and evolution of complex phenotypes. *Ecology letters* 6:265–272.
- Pigliucci, M. and Preston, K., 2004. Phenotypic integration: studying the ecology and evolution of complex phenotypes. Oxford University Press.
- Poorter, H., Fiorani, F., Pieruschka, R., Wojciechowski, T., van der Putten, W. H., Kleyer, M., Schurr, U., and Postma, J. 2016. Pampered inside, pestered outside? differences and similarities between plants growing in controlled conditions and in the field. *New Phytologist* 212:838–855.
- Riaño-Pachón, D. M., Ruzicic, S., Dreyer, I., and Mueller-Roeber, B. 2007. *Plntfdb*: an integrative plant transcription factor database. *BMC bioinformatics* 8:1–10.



- Ruprecht, C., Proost, S., Hernandez-Coronado, M., Ortiz-Ramirez, C., Lang, D., Rensing, S. A., Becker, J. D., Vandepoele, K., and Mutwil, M. 2017*a*. Phylogenomic analysis of gene co-expression networks reveals the evolution of functional modules. *The Plant Journal* 90:447–465.
- Ruprecht, C., Vaid, N., Proost, S., Persson, S., and Mutwil, M. 2017*b*. Beyond genomics: studying evolution with gene coexpression networks. *Trends in Plant Science* 22:298–307.
- Schlichting, C. D. 1989. Phenotypic integration and environmental change. *BioScience* 39:460.
- Schneider, R. F., Li, Y., Meyer, A., and Gunter, H. M. 2014. Regulatory gene networks that shape the development of adaptive phenotypic plasticity in a cichlid fish. *Molecular ecology* 23:4511–4526.
- Smith, H. 1990. Signal perception, differential expression within multigene families and the molecular basis of phenotypic plasticity. *Plant, Cell & Environment* 13:585–594.
- Song, L., Huang, S.-s. C., Wise, A., Castanon, R., Nery, J. R., Chen, H., Watanabe, M., Thomas, J., Bar-Joseph, Z., and Ecker, J. R. 2016. A transcription factor hierarchy defines an environmental stress response network. *Science* 354:aag1550.
- Southworth, L. K., Owen, A. B., and Kim, S. K. 2009. Aging mice show a decreasing correlation of gene expression within genetic modules. *PLoS genetics* 5.
- Stotz, G. C., Salgado-Luarte, C., Escobedo, V. M., Valladares, F., and Gianoli, E. 2021. Global trends in phenotypic plasticity of plants. *Ecology Letters* 24:2267–2281.
- Tanner, R. L., Gleason, L. U., and Dowd, W. W. 2022. Environment-driven shifts in inter-individual variation and phenotypic integration within subnetworks of the mussel transcriptome and proteome. *Molecular ecology* .
- Todaka, D., Nakashima, K., Maruyama, K., Kidokoro, S., Osakabe, Y., Ito, Y., Matsukura, S., Fujita, Y., Yoshiwara, K., Ohme-Takagi, M., et al. 2012. Rice phytochrome-interacting factor-like protein osp11 functions as a key regulator of internode elongation and induces a morphological response to drought stress. *Proceedings of the National Academy of Sciences* 109:15947–15952.
- Toledo, F. and Wahl, G. M. 2006. Regulating the p53 pathway: in vitro hypotheses, in vivo veritas. *Nature Reviews Cancer* 6:909–923.
- Tsai, Y.-C., Weir, N. R., Hill, K., Zhang, W., Kim, H. J., Shiu, S.-H., Schaller, G. E., and Kieber, J. J. 2012. Characterization of genes involved in cytokinin signaling and metabolism from rice. *Plant Physiology* 158:1666–1684.
- van Dijk, D., Sharon, E., Lotan-Pompan, M., Weinberger, A., Segal, E., and Carey, L. B. 2017. Large-scale mapping of gene regulatory logic reveals context-dependent repression by transcriptional activators. *Genome research* 27:87–94.
- Varala, K., Marshall-Colón, A., Cirrone, J., Brooks, M. D., Pasquino, A. V., Léran, S., Mittal, S., Rock, T. M., Edwards, M. B., Kim, G. J., et al. 2018. Temporal transcriptional logic of dynamic regulatory networks underlying nitrogen signaling and use in plants. *Proceedings of the National Academy of Sciences* 115:6494–6499.
- Villamil, C. I. 2018. Phenotypic integration of the cervical vertebrae in the hominoidea (primates). *Evolution* 72:490–517.
- von Koskull-Döring, P., Scharf, K.-D., and Nover, L. 2007. The diversity of plant heat stress transcription factors. *Trends in plant science* 12:452–457.
- Waitt, D. E. and Levin, D. A. 1993. Phenotypic integration and plastic correlations in *phlox drummondii* (polemoniaceae). *American Journal of Botany* 80:1224–1233.
- Wang, J., Wu, G., Chen, L., and Zhang, W. 2013. Cross-species transcriptional network analysis reveals conservation and variation in response to metal stress in cyanobacteria. *BMC genomics* 14:1–11.
- Wang, W., Vinocur, B., Shoseyov, O., and Altman, A. 2004. Role of plant heat-shock proteins and molecular chaperones in the abiotic stress response. *Trends in plant science* 9:244–252.

- Weirauch, M. T., Yang, A., Albu, M., Cote, A. G., Montenegro-Montero, A., Drewe, P., Najafabadi, H. S., Lambert, S. A., Mann, I., Cook, K., et al. 2014. Determination and inference of eukaryotic transcription factor sequence specificity. *Cell* 158:1431–1443.
- West-Eberhard, M. J., 2003. Developmental plasticity and evolution. Oxford University Press.
- Wilkins, O., Hafemeister, C., Plessis, A., Holloway-Phillips, M.-M., Pham, G. M., Nicotra, A. B., Gregorio, G. B., Jagadish, S. K., Septiningsih, E. M., Bonneau, R., et al. 2016. Egrins (environmental gene regulatory influence networks) in rice that function in the response to water deficit, high temperature, and agricultural environments. *The Plant Cell* 28:2365–2384.
- Windram, O., Madhou, P., McHattie, S., Hill, C., Hickman, R., Cooke, E., Jenkins, D. J., Penfold, C. A., Baxter, L., Breeze, E., et al. 2012. Arabidopsis defense against botrytis cinerea: chronology and regulation deciphered by high-resolution temporal transcriptomic analysis. *The Plant Cell* 24:3530–3557.
- Wray, G. A., Hahn, M. W., Abouheif, E., Balhoff, J. P., Pizer, M., Rockman, M. V., and Romano, L. A. 2003. The evolution of transcriptional regulation in eukaryotes. *Molecular biology and evolution* 20:1377–1419.
- Yan, Q., Wu, F., Yan, Z., Li, J., Ma, T., Zhang, Y., Zhao, Y., Wang, Y., and Zhang, J. 2019. Differential co-expression networks of long non-coding rnas and mrnas in cleistogenes songorica under water stress and during recovery. *BMC plant biology* 19:1–19.
- Yano, M., Katayose, Y., Ashikari, M., Yamanouchi, U., Monna, L., Fuse, T., Baba, T., Yamamoto, K., Umehara, Y., Nagamura, Y., et al. 2000. Hd1, a major photoperiod sensitivity quantitative trait locus in rice, is closely related to the arabidopsis flowering time gene constans. *The Plant Cell* 12:2473–2483.
- Yeung, E., van Veen, H., Vashisht, D., Paiva, A. L. S., Hummel, M., Rankenberg, T., Steffens, B., Steffen-Heins, A., Sauter, M., de Vries, M., et al. 2018. A stress recovery signaling network for enhanced flooding tolerance in arabidopsis thaliana. *Proceedings of the National Academy of Sciences* 115:E6085–E6094.
- Yu, H. and Gerstein, M. 2006. Genomic analysis of the hierarchical structure of regulatory networks. *Proceedings of the National Academy of Sciences* 103:14724–14731.
- Yuan, W., Beaulieu-Jones, B. K., Yu, K.-H., Lipnick, S. L., Palmer, N., Loscalzo, J., Cai, T., and Kohane, I. S. 2021. Temporal bias in case-control design: preventing reliable predictions of the future. *Nature Communications* 12:1107. URL <https://doi.org/10.1038/s41467-021-21390-2>.
- Zander, M., Lewsey, M. G., Clark, N. M., Yin, L., Bartlett, A., Guzmán, J. P. S., Hann, E., Langford, A. E., Jow, B., Wise, A., et al. 2020. Integrated multi-omics framework of the plant response to jasmonic acid. *Nature Plants* 6:290–302.
- Zeisel, A., Muñoz-Manchado, A. B., Codeluppi, S., Lönnerberg, P., La Manno, G., Juréus, A., Marques, S., Munguba, H., He, L., Betsholtz, C., et al. 2015. Cell types in the mouse cortex and hippocampus revealed by single-cell rna-seq. *Science* 347:1138–1142.
- Zhao, X., Yu, H., Kong, L., and Li, Q. 2016. Gene co-expression network analysis reveals the correlation patterns among genes in euryhaline adaptation of crassostrea gigas. *Marine Biotechnology* 18:535–544.
- Zheng, K., Wang, X., Wang, Y., and Wang, S. 2021. Conserved and non-conserved functions of the rice homologs of the arabidopsis trichome initiation-regulating mbw complex proteins. *BMC plant biology* 21:1–15.
